# Supplementary material for: Succinate ester derivative of δ-tocopherol enhances the protective effects against 60Co γ-ray-induced hematopoietic injury through granulocyte colony-stimulating factor induction in mice
Source: PubMed Central journal article supplement (PMC5286428; doi:10.1038/srep40380), 2017-02-01

## SUPPLEMENTAL MATERIAL

# **Succinate ester derivative of $\delta$ -tocopherol enhances the protective effects against $^{60}\text{Co}$ $\gamma$ -ray-induced hematopoietic injury through granulocyte colony-stimulating factor induction in mice**

Zhong-Tang Li <sup>a#</sup>, Li-Mei Wang <sup>a#</sup>, Li-Rong Yi <sup>#</sup>, Chao Jia<sup>a</sup>, Fan Bai <sup>a</sup>, Ren-Jun Peng <sup>a</sup>,  
Zu-Yin Yu <sup>a</sup>, Guo-Lin Xiong <sup>a</sup>, Shuang Xing <sup>a</sup>, Ya-Jun Shan <sup>a</sup>, Ri-Fang Yang <sup>c</sup>,  
Jun-Xing Dong <sup>b\*</sup>, Yu-Wen Cong <sup>a\*</sup>

<sup>a</sup> Department of Pathophysiology, <sup>b</sup> Department of Pharmaceutical Sciences, Beijing Key Laboratory for Radiobiology (BKLRB), Beijing Institute of Radiation Medicine, Beijing, China

<sup>c</sup> Department of Medicinal Chemistry, Beijing Institute of Pharmacology and Toxicology, Beijing, China

# These authors contributed equally to the study.

\*Corresponding author: Yu-Wen Cong, Department of Pathophysiology, Beijing Institute of Radiation Medicine, No. 27 Taiping Road, Beijing 100850, China, and Jun-Xing Dong, Department of Medicinal Chemistry, Beijing Institute of Radiation Medicine, No. 27 Taiping Road, Beijing 100850, China

Tel.: +86 10 68210077 Ext. 931223; fax +86 10 68214653; e-mail:

congyw@nic.bmi.ac.cn

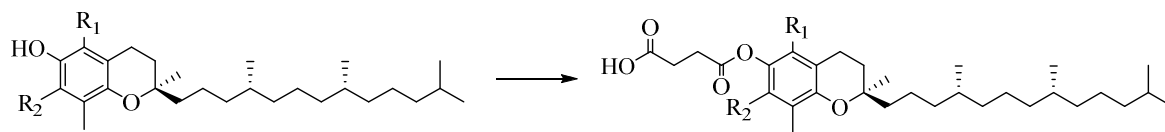

$\alpha$  -TOS: R<sub>1</sub>=methyl; R<sub>2</sub>=methyl  
 $\gamma$  -TOS: R<sub>1</sub>=H; R<sub>2</sub>=methyl  
 $\delta$  -TOS: R<sub>1</sub>=H; R<sub>2</sub>=H

Reagents and conditions: Succine anhydride, hexane, TEA, refluxing, 10h, 85-94%.

### Supplemental Figure 1. syntheses of tocopherol succinates

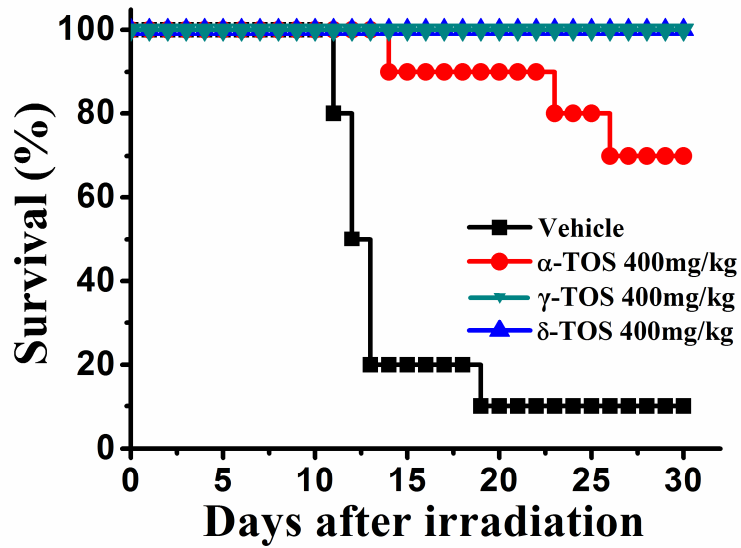

**Supplemental Figure 2. Tocopherol derivatives protected mice from the 9.0 Gy TBI.**

Kaplan-Meier survival rate curve of 4 groups (n=10) respectively administrated with PEG400 (vehicle), α-TS (400 mg/kg), γ-TOS (400 mg/kg) and δ-TOS (400 mg/kg) 24 h before and 1 h after the 9.0 Gy TBI. *P* value was calculated by log-rank test.

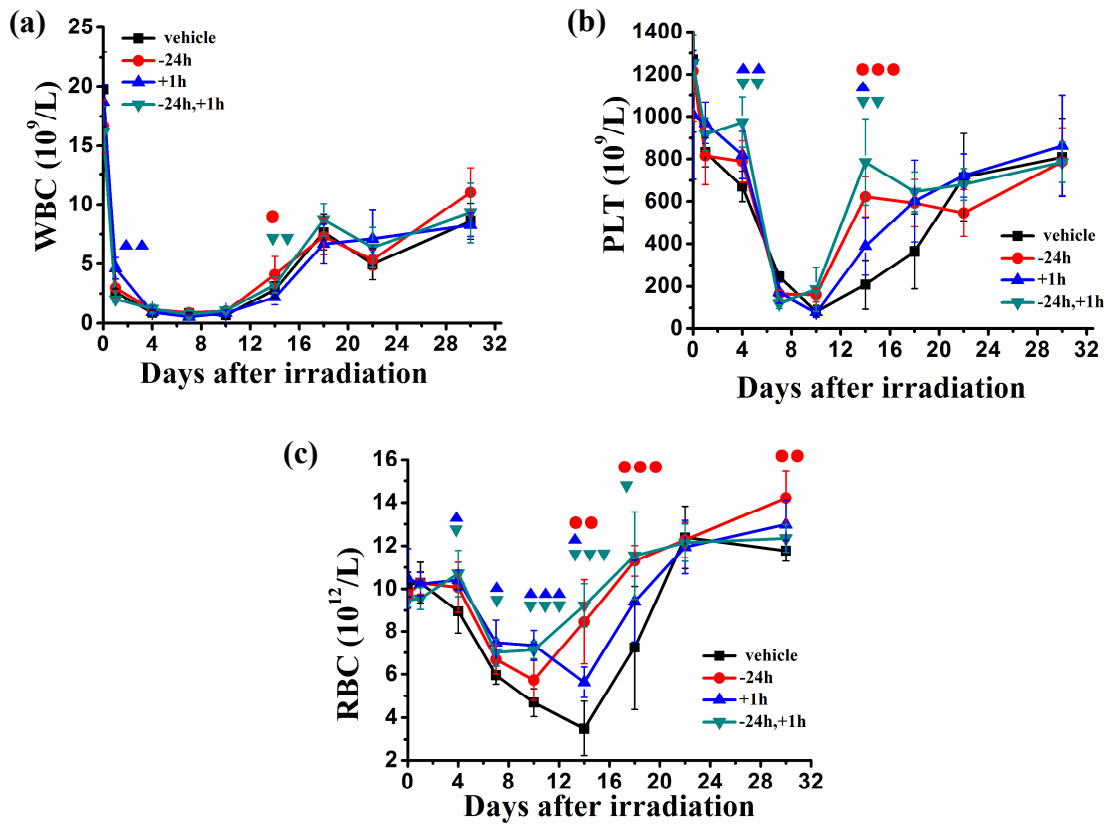

**Supplemental Figure 3. Radioprotection and mitigation of  $\delta$ -TOS against radiation**

**induced hematopoietic injury.** (a) The white blood cells count, (b) the platelets count, (c)

the red blood cells count in 30 days after the 6.5 Gy TBI of 3 groups (n=8) respectively

administrated with  $\delta$ -TOS (100 mg/kg) 24 h before, 1 h after, and 24 h before & 1 h after

the irradiation. The control group was administrated with PEG400 (vehicle) 24 h before &

1 h after the irradiation. Data represent the mean $\pm$ S.E.M. (n=8); ●P, ▲P, ▼P<0.05;

●●P, ▲▲P, ▼▼P<0.01; ●●●P, ▲▲▲P, ▼▼▼P<0.001 vs. control (vehicle) group.

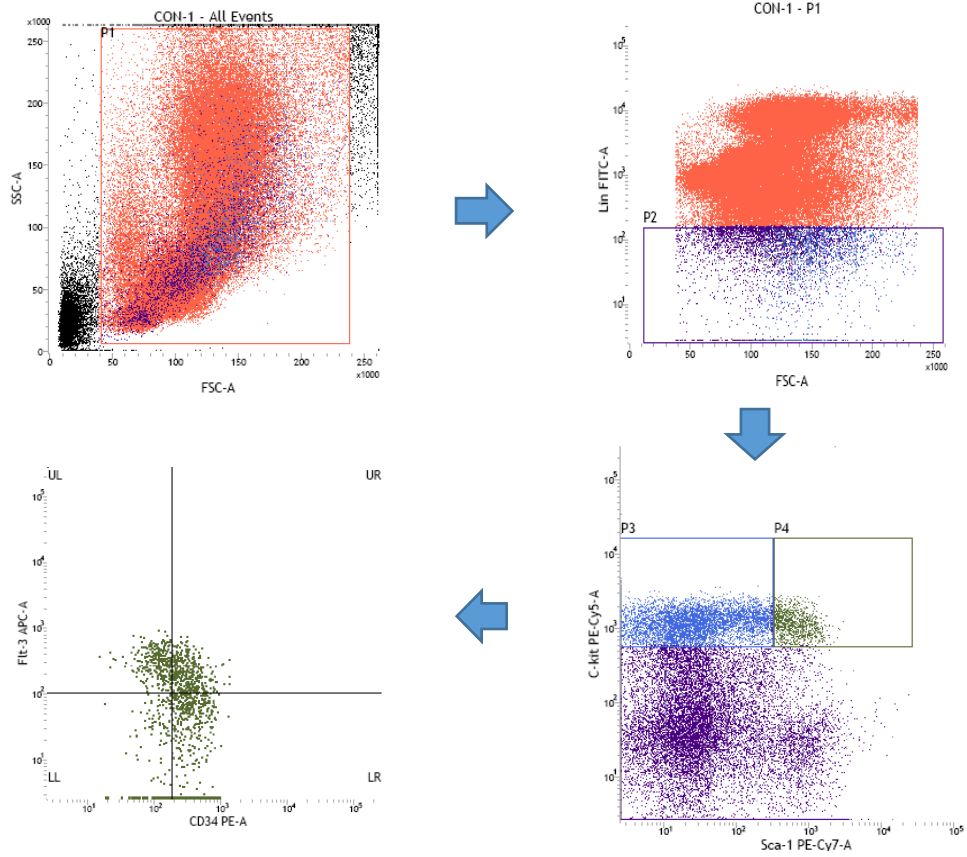

**Supplemental Figure 4. Flow cytometric assays of hematopoietic stem and progenitor cell of mouse bone marrow cells**

# Supplemental Figure 5.

$\alpha$ -TOS

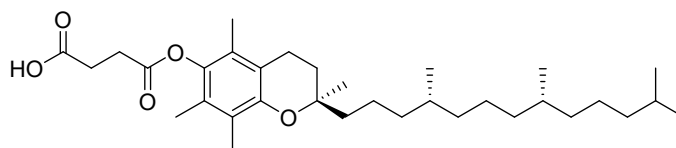

Chemical Formula:  $C_{33}H_{54}O_5$   
Molecular Weight: 530.79

$H^1$ -NMR

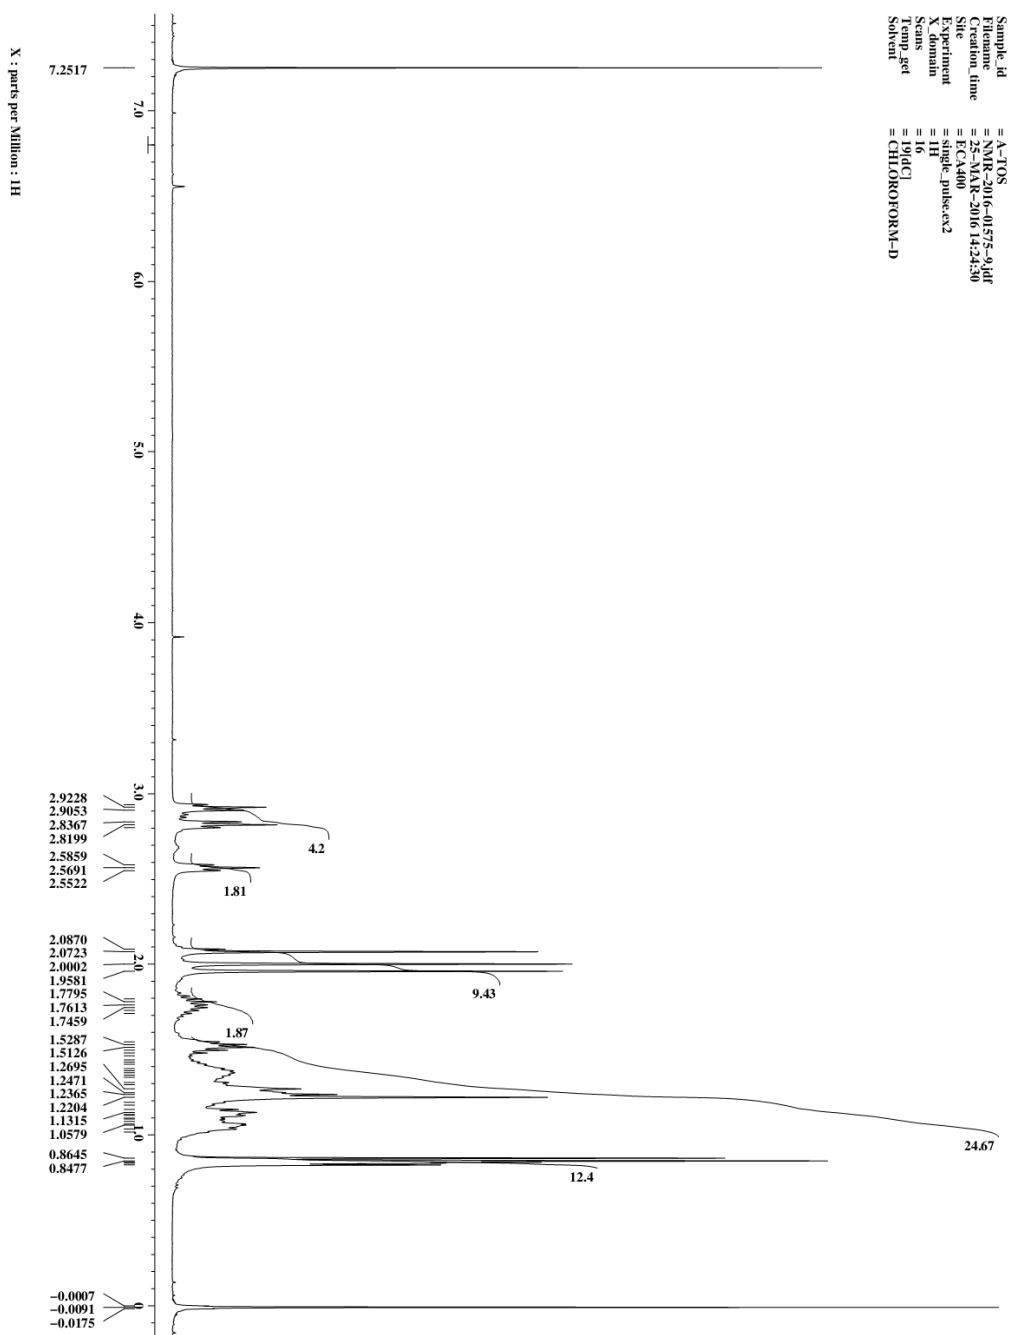

### Qualitative Analysis Report

|                        |            |               |                             |
|------------------------|------------|---------------|-----------------------------|
| Data Filename          | 0907.d     | Sample Name   | A-TOS                       |
| Instrument Name        | TOF 66230A | Acquired Time | 2016-03-25                  |
| Acq Method             | YCLM       | Acquired SW   | 6200 series TOF/6500 series |
| IRM Calibration Status | Success    |               |                             |

User Chromatograms

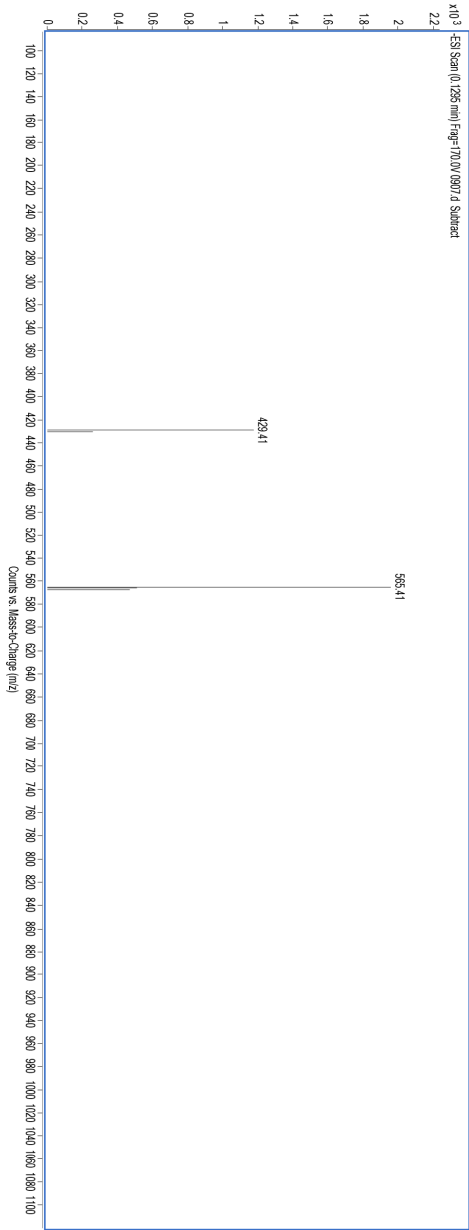

$\gamma$ -TOS

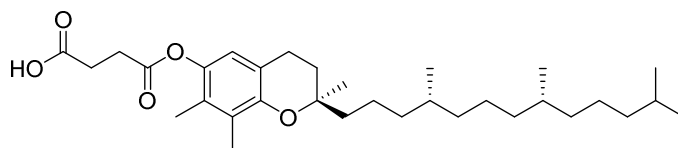

Chemical Formula:  $C_{32}H_{52}O_5$   
Molecular Weight: 516.76

$H^1$ -NMR

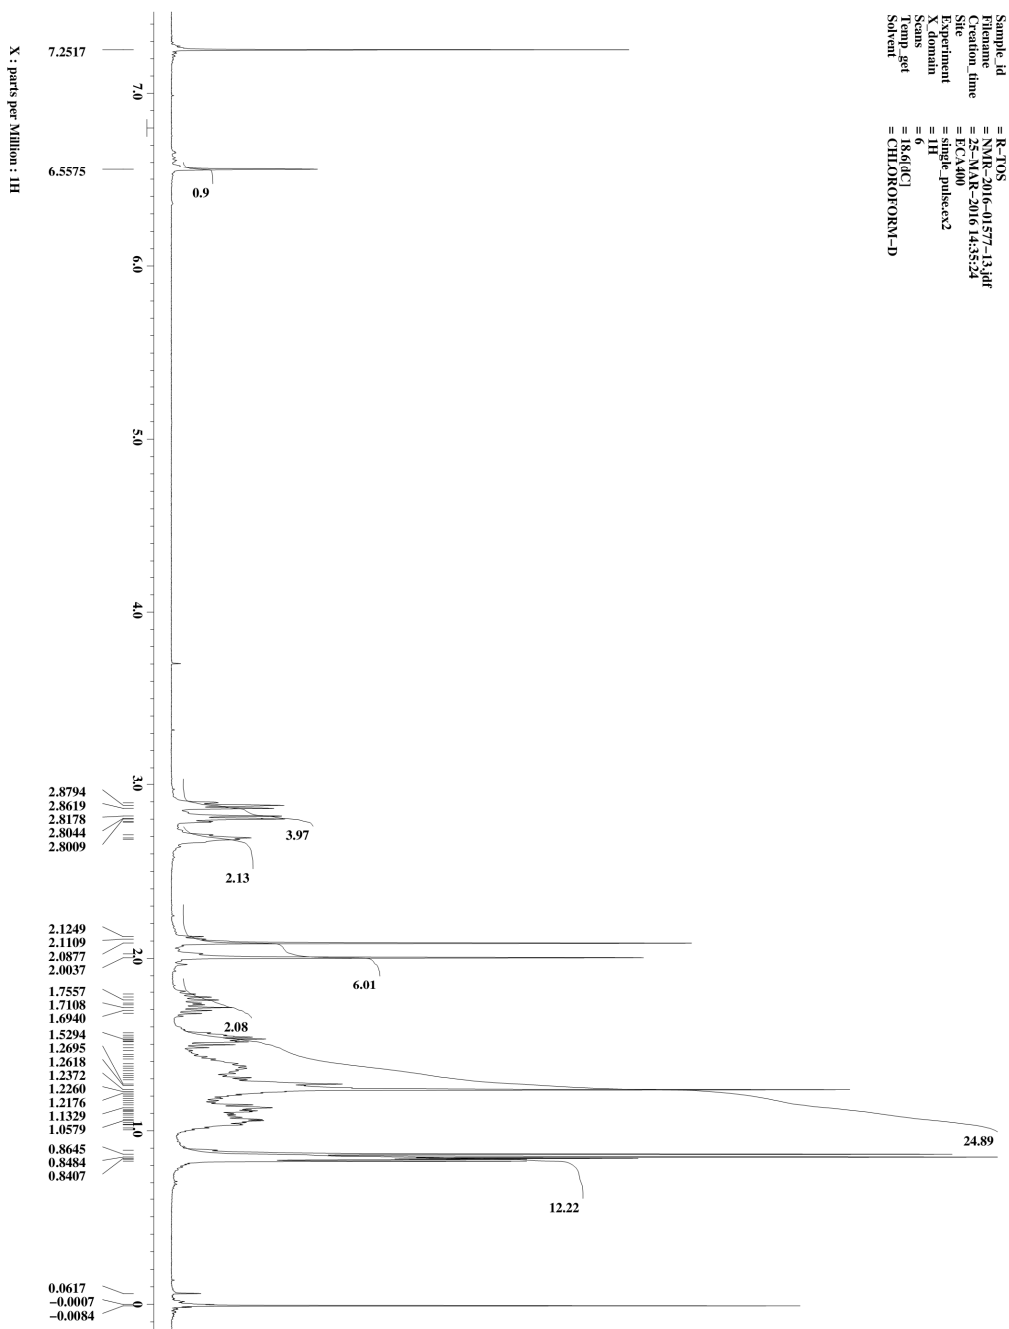



### Qualitative Analysis Report

|                        |           |               |                             |
|------------------------|-----------|---------------|-----------------------------|
| Data Filename          | 0908.d    | Sample Name   | R-TOS                       |
| Instrument Name        | TOF 6230A | Acquired Time | 2016-03-25                  |
| Acq Method             | YCLM      | Acquired SW   | 6200 series TOF/5500 series |
| IRM Calibration Status | Success   |               |                             |
| User Chromatograms     |           |               |                             |

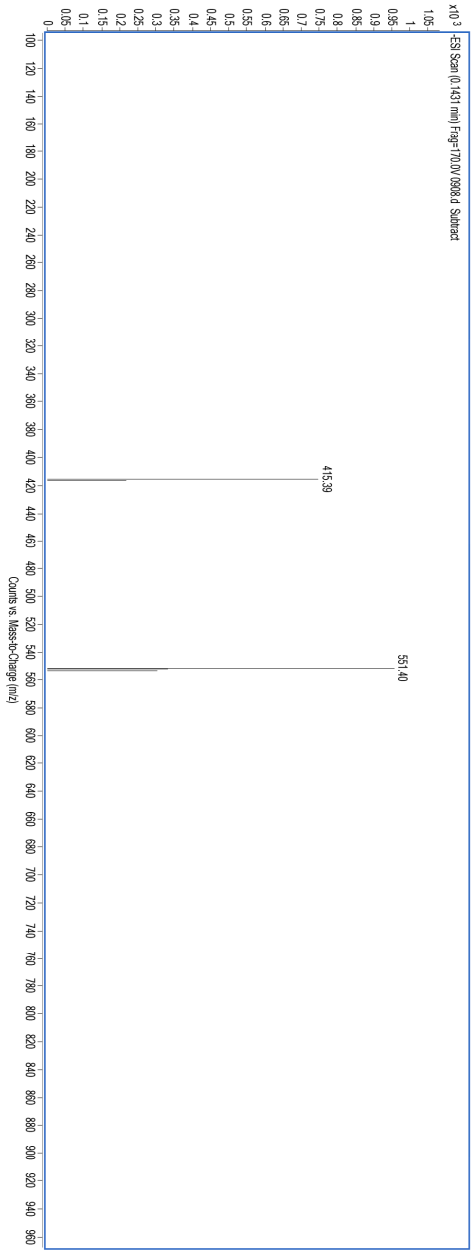

δ-TOS

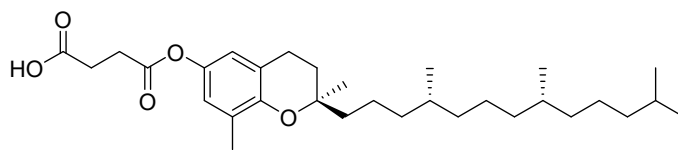

Chemical Formula: C<sub>31</sub>H<sub>50</sub>O<sub>5</sub>  
Molecular Weight: 502.74

<sup>1</sup>H-NMR

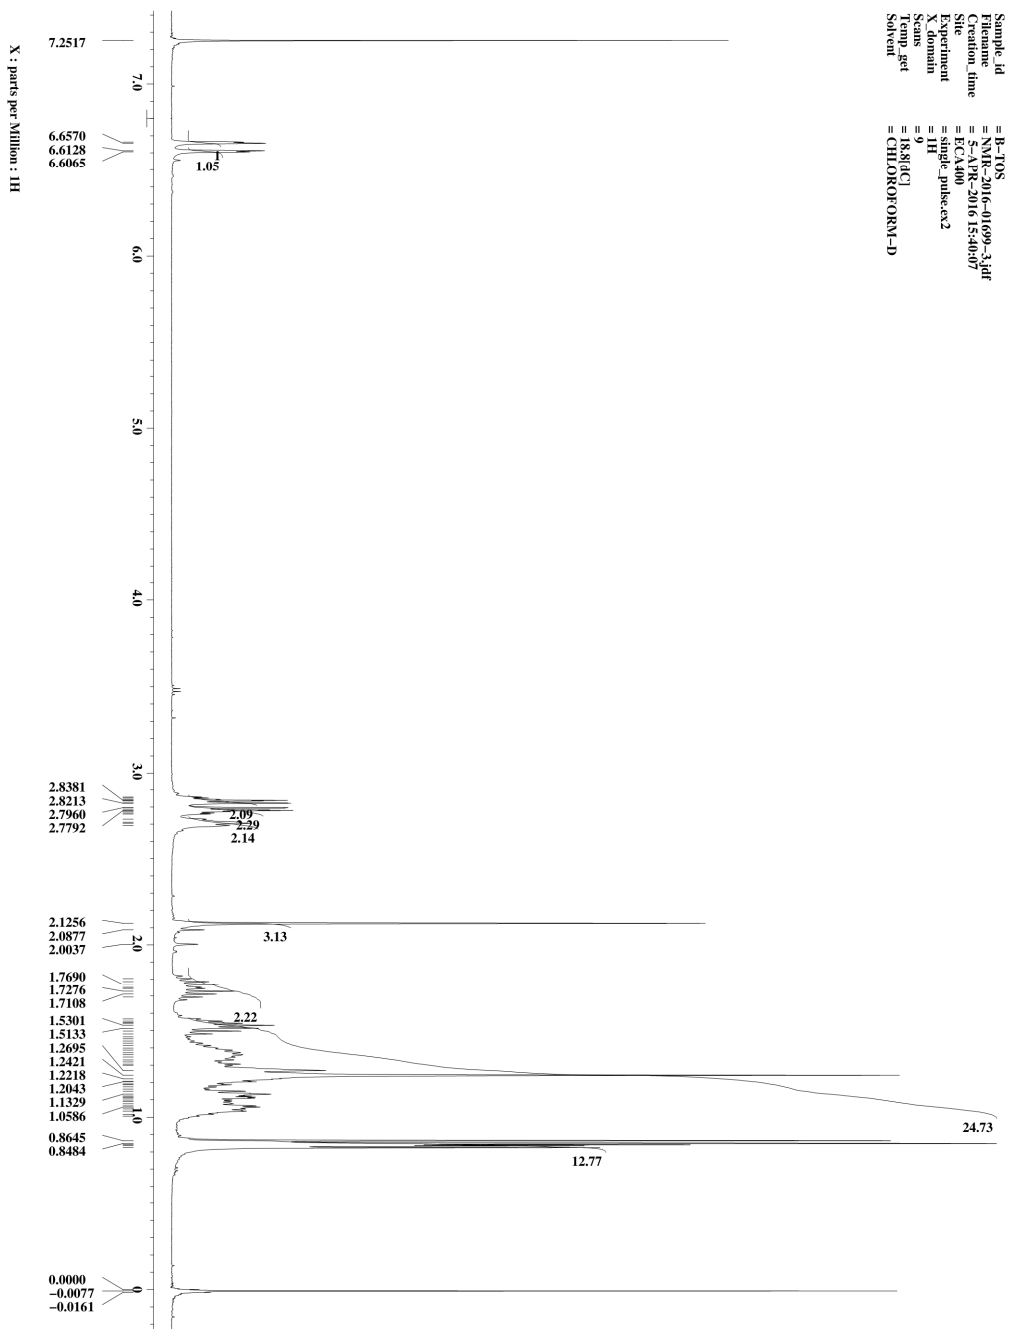

### Qualitative Analysis Report

|                               |            |                      |                             |
|-------------------------------|------------|----------------------|-----------------------------|
| <b>Data Filename</b>          | 1033-1.d   | <b>Sample Name</b>   | B-TOS                       |
| <b>Instrument Name</b>        | TOF G6230A | <b>Acquired Time</b> | 2016-04-05                  |
| <b>Acq Method</b>             | YCLM       | <b>Acquired SW</b>   | 6200 series TOF/6500 series |
| <b>IRM Calibration Status</b> | Success    |                      |                             |
| <b>User Chromatograms</b>     |            |                      |                             |

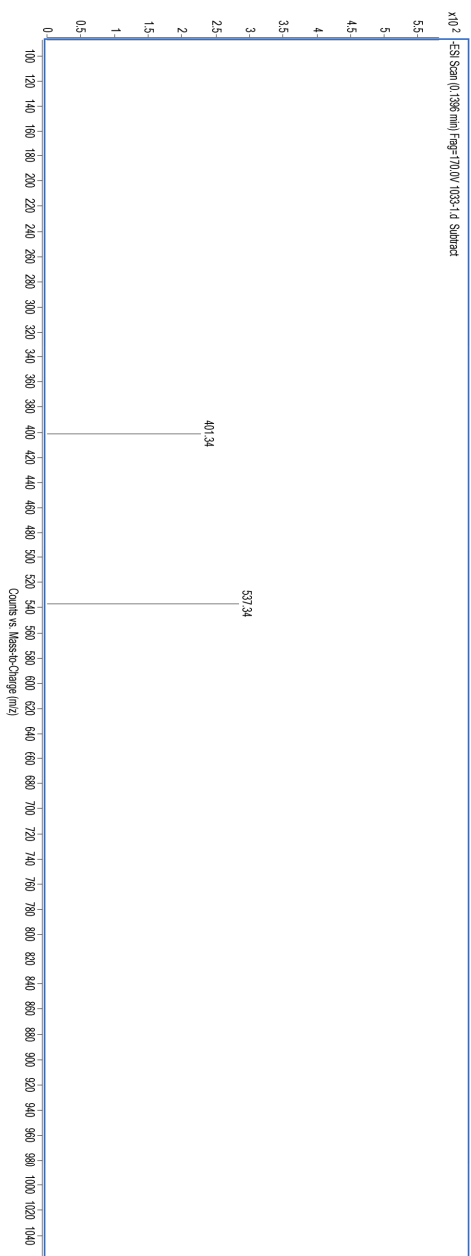

Supplement: srep40380-s1.pdf [file srep40380-s1.pdf]
